# Supplementary material for: Composition and Structure of Arabidopsis thaliana Extrachromosomal Circular DNAs Revealed by Nanopore Sequencing
Source: MDPI journal article supplement (doi:10.3390/plants12112178), 2023-05-30
Supplement: s1 [file s1]

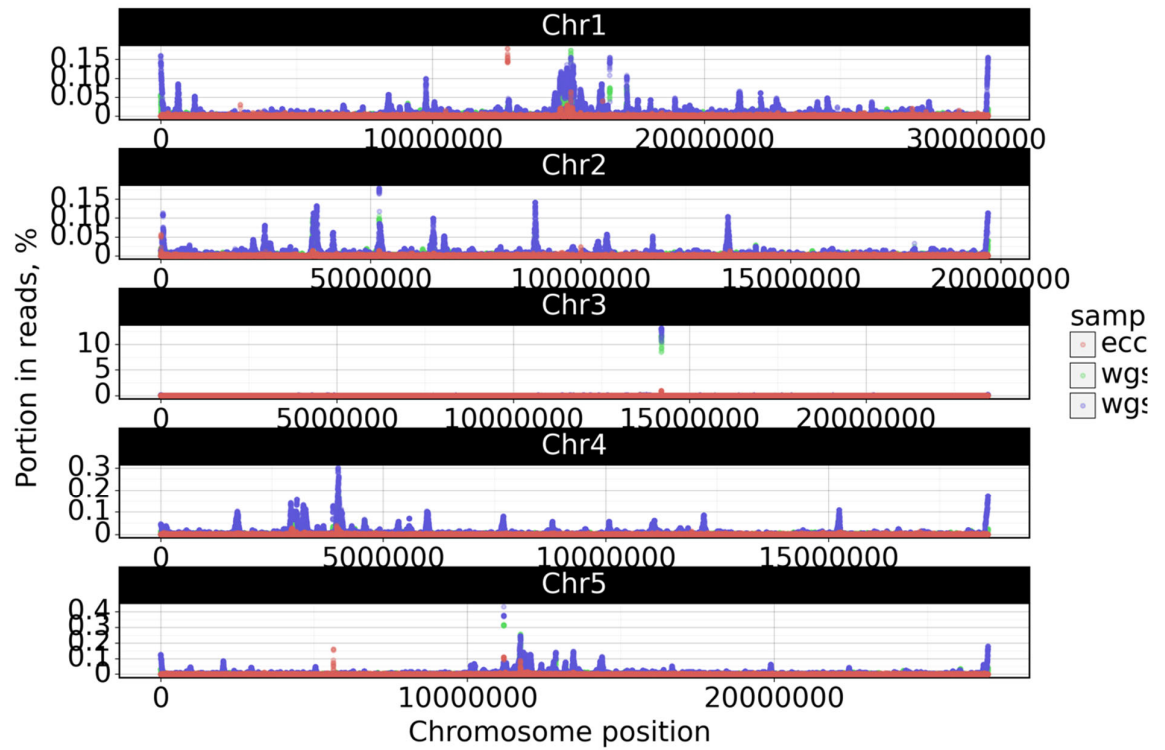

**Figure S1.** Mapping of selected concatemer reads with 2 or more monomers obtained from Nanopore sequencing eccDNA-enriched ddm1 DNA (red) as well as whole-genome sequencing of Col-0 (green) and ddm1 (blue) plants.

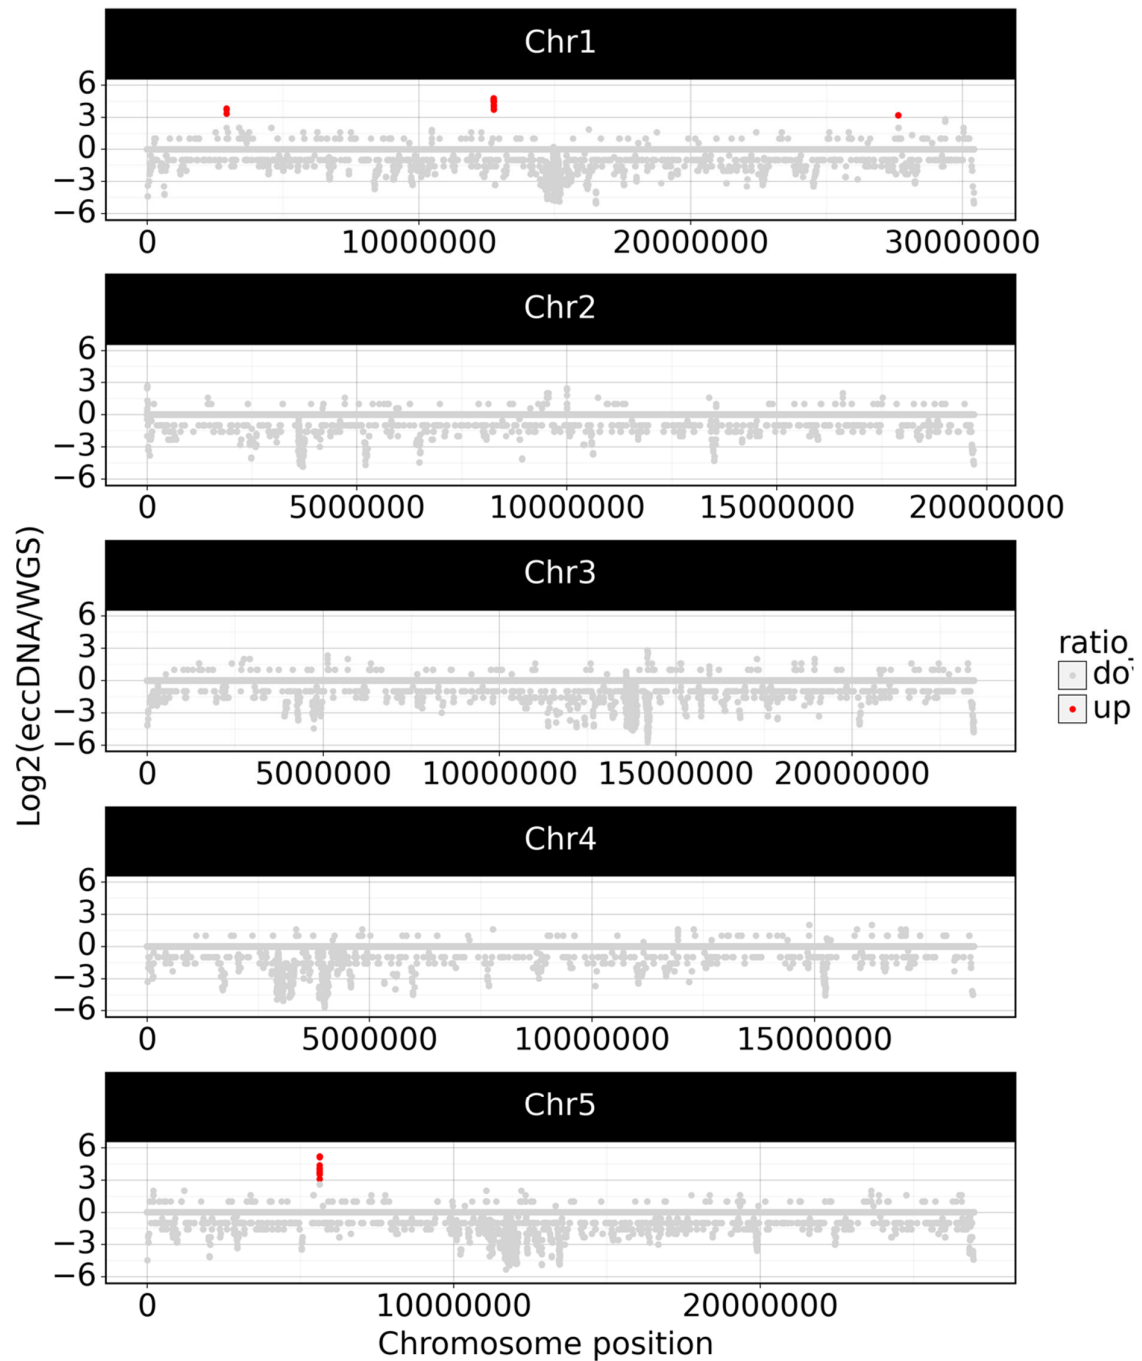

**Figure S2. EccDNA read coverage of genome loci.** Dots indicate log2 ratio between number of concatemer reads of eccDNA and WGS samples for *ddm1* plants. Red and grey colors show regions with the log2 ratio  $>3$  or  $\leq 3$ , respectively.

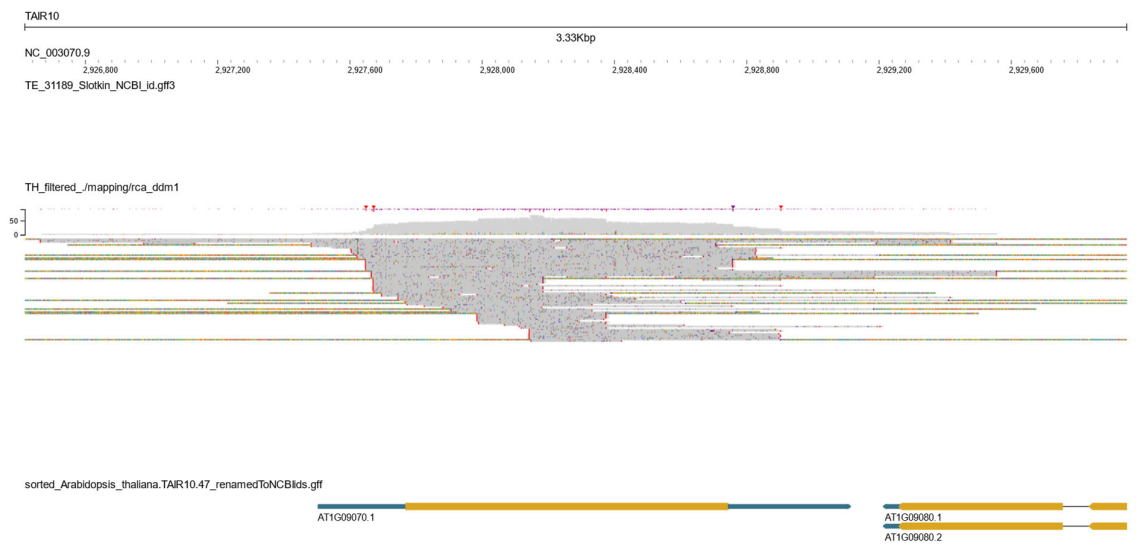

**Supplementary Figure S3.** Coverage of AT1G09070 gene (Chr1:2,927,502..2,929,107) by Nanopore concatemer reads from eccDNA-enriched DNA of ddm1.

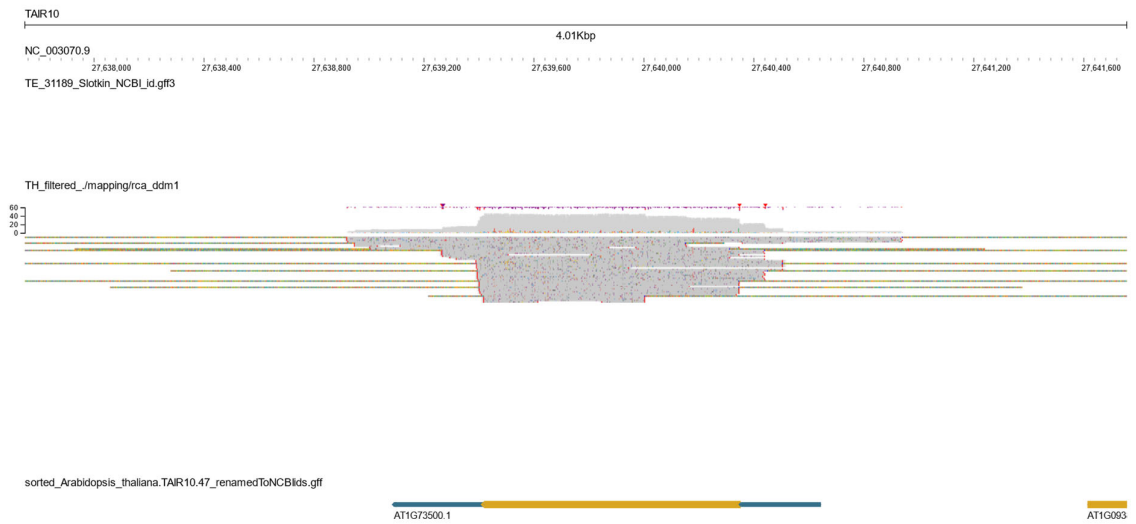

**Figure S4.** Coverage of AT1G73500 gene (Chr1: 27,637,748..27,641,755) by Nanopore concatemer reads from eccDNA-enriched DNA of ddm1.

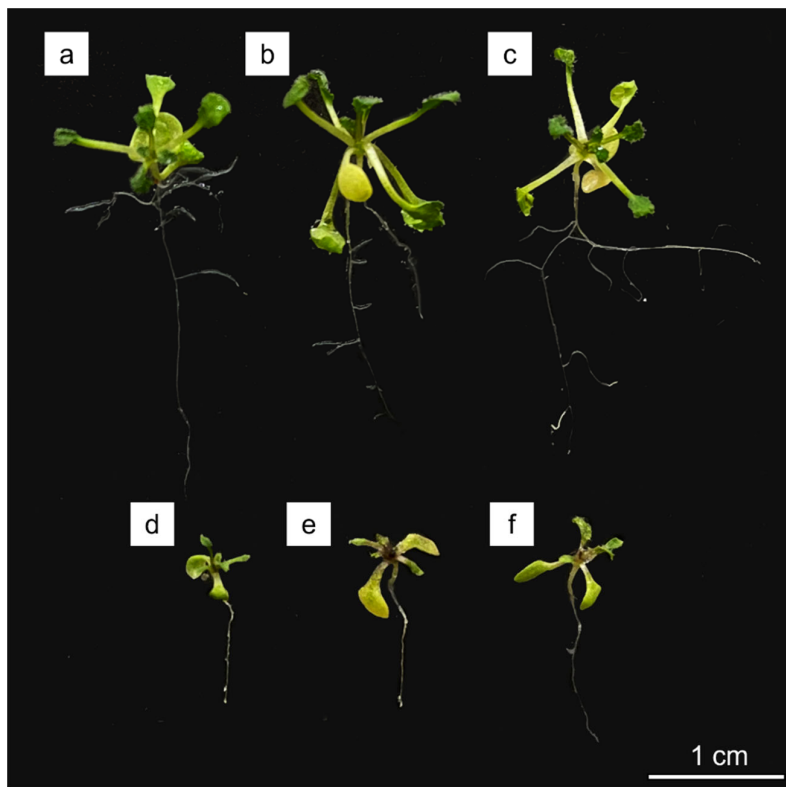

**Figure S5. Inhibition of *A.thaliana* Col-0 growth and development under toxin treatment (zebularine and  $\alpha$ -amanitin).** a, b, c – control plants grown *in vitro*; d, e, f – plants grown on  $\frac{1}{2}$  MS supplemented with zebularine and  $\alpha$ -amanitin.

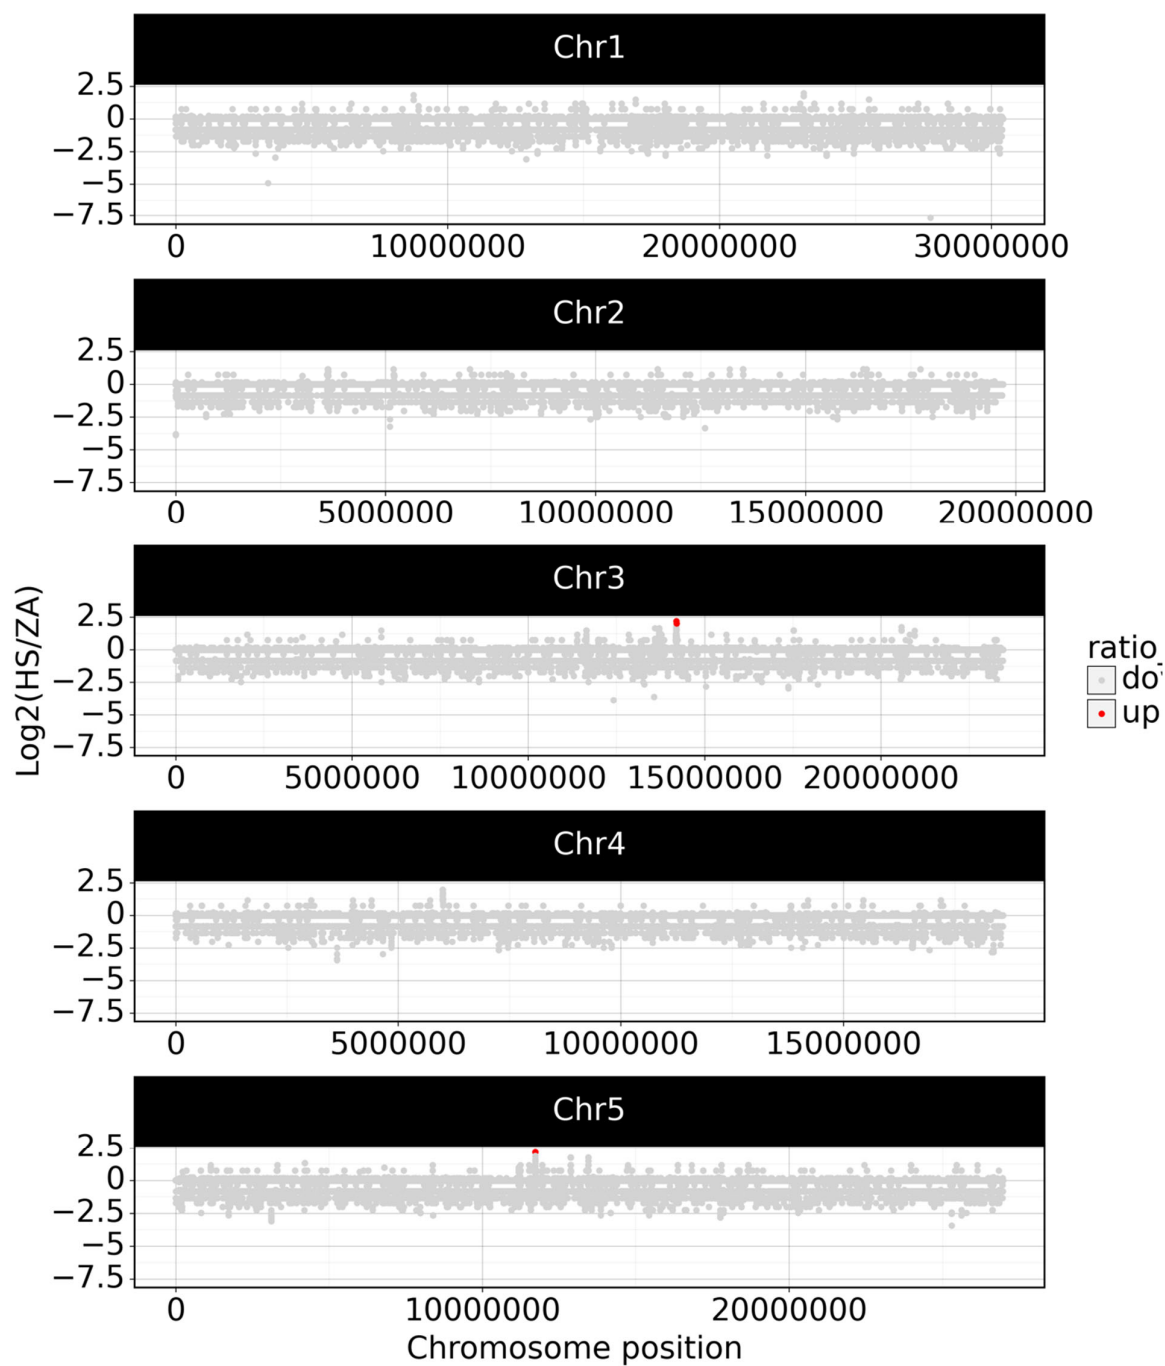

**Figure S6. EccDNA read coverage of genomic loci in ZA vs K sample.** Dots indicate  $\text{log}_2$  ratio between number of concatemer reads of eccDNA for ZA vs K sample. Red and grey colors show regions with the  $\text{log}_2$  ratio  $\geq 2$  or  $< 2$ , respectively.

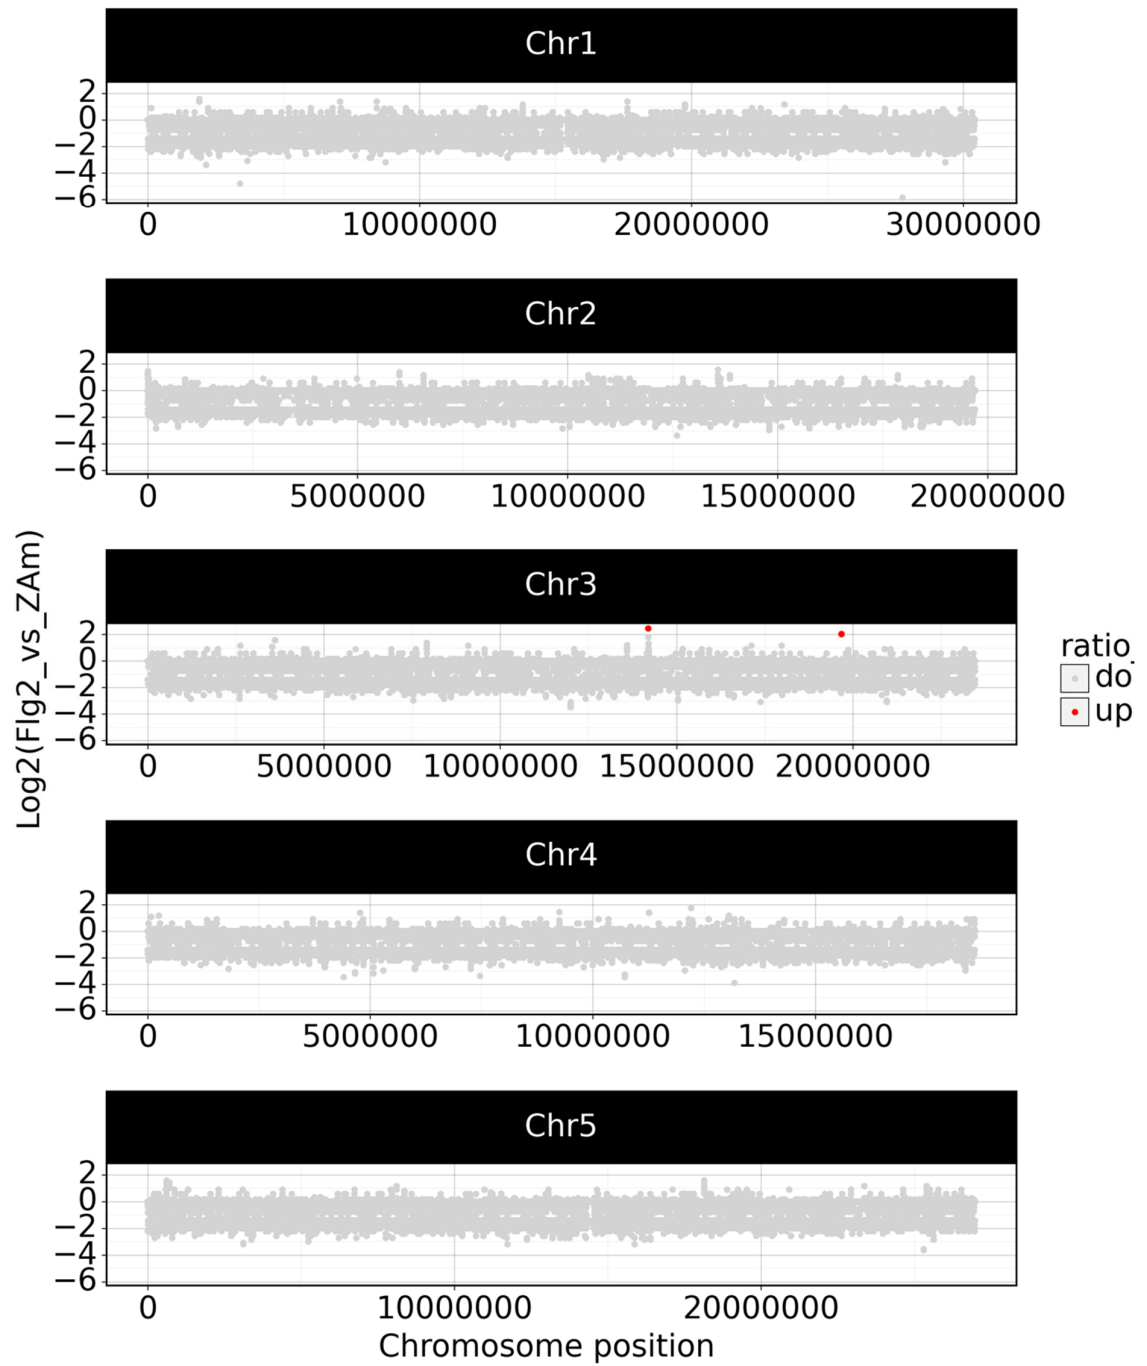

**Figure S7. EccDNA read coverage of genomic loci from Flg samples (replicate 1).** Dots indicate  $\log_2$  ratio between number of concatemer reads of eccDNA for Flg vs ZA sample. Red and grey colors show regions with the  $\log_2$  ratio  $\geq 2$  or  $< 2$ , respectively.

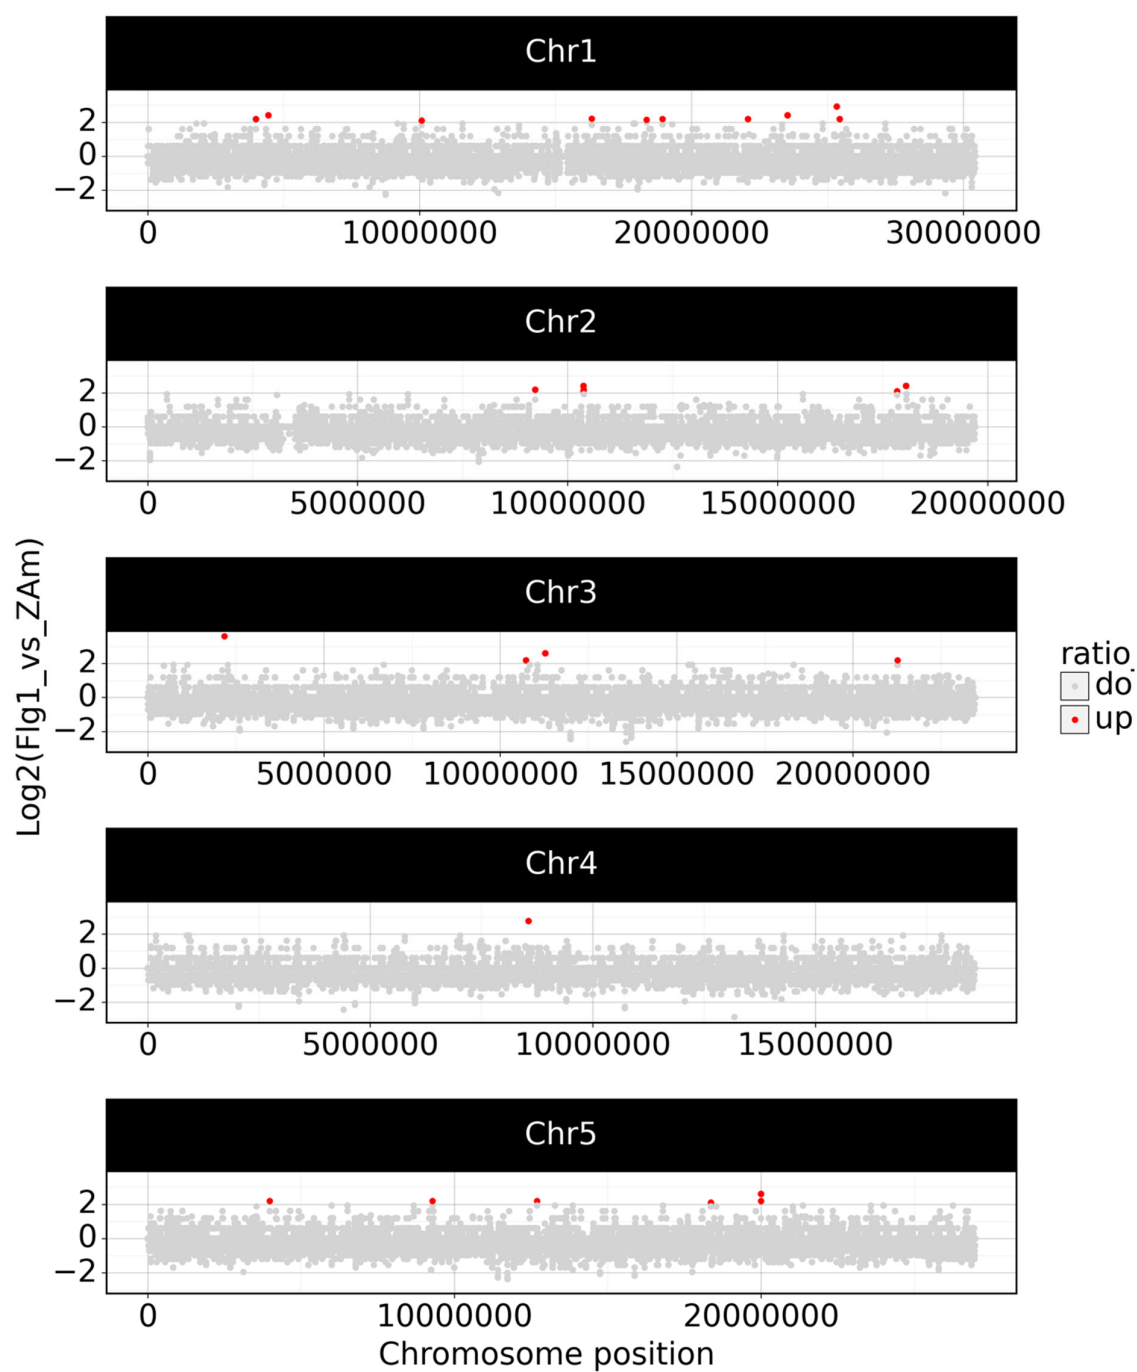

**Figure S8. EccDNA read coverage of genomic loci from Flg samples (replicate 2).** Dots indicate  $\text{log}_2$  ratio between number of concatemer reads of eccDNA for Flg vs ZA sample. Red and grey colors show regions with the  $\text{log}_2$  ratio  $\geq 2$  or  $< 2$ , respectively.

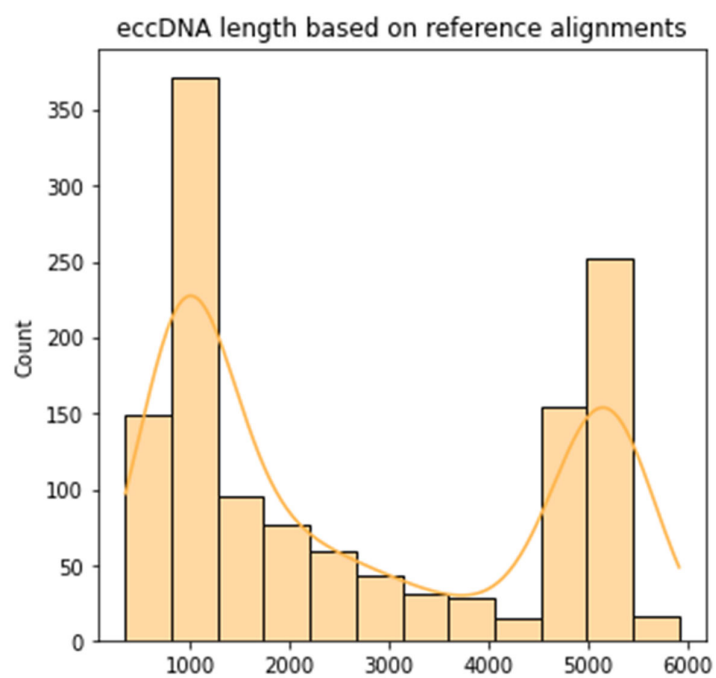

**Figure S9.** The histogram showing number of EVD eccDNAs of different length.
